# Supplementary material for: Structural contributions of Zn in enhancing CO 2 hydrogenation to methanol over Zn x ZrO y catalysts
Source: Royal Society of Chemistry journal article supplement (doi:10.1039/d4cy01175a), 2024-12-12
Supplement: d4cy01175a1.pdf [file d4cy01175a1.pdf]

## Supporting information

### Role of Zn in enhancing CO<sub>2</sub> hydrogenation to methanol over Zn<sub>x</sub>ZrO<sub>y</sub> catalysts

Zinat Zanganeh <sup>a</sup>, Max Bols <sup>a</sup>, Parviz Yazdani <sup>a</sup>, Hilde Poelman <sup>a</sup>, and Mark Saeys <sup>\*a</sup>

<sup>a</sup> *Laboratory for Chemical Technology, Ghent University, Technologiepark 125, B-9052 Gent, Belgium.*

\* *Corresponding author: [mark.saeys@ugent.be](mailto:mark.saeys@ugent.be)*

### Section 1. SEM-EDX

**Table S1.** Catalysts' composition measured by SEM-EDX.

|    | wt.%  | ZrO <sub>2</sub> | Zn <sub>0.01</sub> ZrO <sub>y</sub> -500 | Zn <sub>0.07</sub> ZrO <sub>y</sub> -500 | Zn <sub>0.19</sub> ZrO <sub>y</sub> -500 | Zn <sub>0.28</sub> ZrO <sub>y</sub> -500 | Zn <sub>0.44</sub> ZrO <sub>y</sub> -500 | Zn <sub>0.56</sub> ZrO <sub>y</sub> -500 | Zn <sub>0.19</sub> ZrO <sub>y</sub> -550 | Zn <sub>0.19</sub> ZrO <sub>y</sub> -700 | Zn <sub>0.19</sub> ZrO <sub>y</sub> -800 |
|----|-------|------------------|------------------------------------------|------------------------------------------|------------------------------------------|------------------------------------------|------------------------------------------|------------------------------------------|------------------------------------------|------------------------------------------|------------------------------------------|
| a* | Zn    | ---              | 1.19                                     | 5.54                                     | 11.52                                    | 14.77                                    | 35.19                                    | 37.77                                    | 11.36                                    | 10.67                                    | 9.76                                     |
|    | Zr    | 40.46            | 48.44                                    | 44.25                                    | 33.35                                    | 29.53                                    | 25.94                                    | 20.56                                    | 41.25                                    | 40.11                                    | 41.42                                    |
|    | O     | 59.54            | 50.37                                    | 50.21                                    | 55.13                                    | 55.7                                     | 38.87                                    | 41.67                                    | 47.38                                    | 49.22                                    | 48.82                                    |
|    | Zn/Zr | ---              | 0.02                                     | 0.13                                     | 0.35                                     | 0.50                                     | 1.36                                     | 1.84                                     | 0.28                                     | 0.27                                     | 0.24                                     |
| b* | Zn    | ---              | 0.25                                     | 4.12                                     | 8.75                                     | 11.58                                    | 27.81                                    | 31.63                                    | 9.16                                     | 8.1                                      | 7.15                                     |
|    | Zr    | 62.21            | 67.98                                    | 64.6                                     | 53.55                                    | 50.43                                    | 44.83                                    | 36.64                                    | 60.7                                     | 60.79                                    | 61.89                                    |
|    | O     | 37.79            | 31.78                                    | 31.27                                    | 37.7                                     | 37.99                                    | 27.36                                    | 31.73                                    | 30.14                                    | 31.11                                    | 30.96                                    |
|    | Zn/Zr | ---              | 0.00                                     | 0.06                                     | 0.16                                     | 0.23                                     | 0.62                                     | 0.86                                     | 0.15                                     | 0.13                                     | 0.12                                     |
| c* | Zn    | ---              | 0.15                                     | 3.25                                     | 7.31                                     | 10.71                                    | 23.74                                    | 28.71                                    | 7.57                                     | 6.79                                     | 6.19                                     |
|    | Zr    | 73.17            | 78.27                                    | 74.81                                    | 64.58                                    | 60.3                                     | 55.08                                    | 46.73                                    | 70.13                                    | 70.5                                     | 71.08                                    |
|    | O     | 26.83            | 21.58                                    | 21.94                                    | 28.11                                    | 28.99                                    | 21.18                                    | 24.56                                    | 22.3                                     | 22.71                                    | 22.73                                    |
|    | Zn/Zr | ---              | 0.00                                     | 0.04                                     | 0.11                                     | 0.18                                     | 0.43                                     | 0.61                                     | 0.11                                     | 0.10                                     | 0.09                                     |
| d* | Zn    | ---              | 2.09                                     | 2.64                                     | 6.74                                     | 9.42                                     | 21.1                                     | 25.33                                    | 6.39                                     | 5.92                                     | 5.39                                     |
|    | Zr    | 79.82            | 61.8                                     | 80.1                                     | 71.21                                    | 66.79                                    | 61.31                                    | 53.28                                    | 76.14                                    | 75.87                                    | 77.15                                    |
|    | O     | 20.18            | 36.12                                    | 17.26                                    | 22.05                                    | 23.8                                     | 17.59                                    | 21.39                                    | 17.47                                    | 18.21                                    | 17.46                                    |
|    | Zn/Zr | ---              | 0.03                                     | 0.03                                     | 0.09                                     | 0.14                                     | 0.34                                     | 0.48                                     | 0.08                                     | 0.08                                     | 0.07                                     |

|    | Atomic % | ZrO <sub>2</sub> | Zn <sub>0.01</sub> ZrO <sub>y</sub> -500 | Zn <sub>0.07</sub> ZrO <sub>y</sub> -500 | Zn <sub>0.19</sub> ZrO <sub>y</sub> -500 | Zn <sub>0.28</sub> ZrO <sub>y</sub> -500 | Zn <sub>0.44</sub> ZrO <sub>y</sub> -500 | Zn <sub>0.56</sub> ZrO <sub>y</sub> -500 | Zn <sub>0.19</sub> ZrO <sub>y</sub> -550 | Zn <sub>0.19</sub> ZrO <sub>y</sub> -700 | Zn <sub>0.19</sub> ZrO <sub>y</sub> -800 |
|----|----------|------------------|------------------------------------------|------------------------------------------|------------------------------------------|------------------------------------------|------------------------------------------|------------------------------------------|------------------------------------------|------------------------------------------|------------------------------------------|
| a* | Zn       | ---              | 0.49                                     | 2.28                                     | 4.42                                     | 5.61                                     | 16.55                                    | 16.96                                    | 4.85                                     | 4.43                                     | 4.09                                     |
|    | Zr       | 10.65            | 14.36                                    | 13.08                                    | 9.17                                     | 8.03                                     | 8.74                                     | 6.62                                     | 12.61                                    | 11.95                                    | 12.42                                    |
|    | O        | 89.35            | 85.15                                    | 84.64                                    | 86.41                                    | 86.36                                    | 74.7                                     | 76.43                                    | 82.55                                    | 83.62                                    | 83.49                                    |
|    | Zn/Zr    | ---              | 0.03                                     | 0.17                                     | 0.48                                     | 0.70                                     | 1.89                                     | 2.56                                     | 0.38                                     | 0.37                                     | 0.33                                     |
| b* | Zn       | ---              | 0.14                                     | 2.31                                     | 4.35                                     | 5.71                                     | 16.19                                    | 16.86                                    | 5.21                                     | 4.53                                     | 4.02                                     |
|    | Zr       | 22.4             | 27.25                                    | 25.98                                    | 19.08                                    | 17.81                                    | 18.71                                    | 14                                       | 24.74                                    | 24.37                                    | 24.91                                    |
|    | O        | 77.6             | 72.62                                    | 71.71                                    | 76.57                                    | 76.49                                    | 65.1                                     | 69.14                                    | 70.04                                    | 71.1                                     | 71.07                                    |
|    | Zn/Zr    | ---              | 0.01                                     | 0.09                                     | 0.23                                     | 0.32                                     | 0.87                                     | 1.20                                     | 0.21                                     | 0.19                                     | 0.16                                     |
| c* | Zn       | ---              | 0.10                                     | 2.22                                     | 4.34                                     | 6.21                                     | 15.85                                    | 17.66                                    | 5.08                                     | 4.52                                     | 4.13                                     |
|    | Zr       | 32.35            | 38.84                                    | 36.59                                    | 27.48                                    | 25.07                                    | 26.36                                    | 20.6                                     | 33.74                                    | 33.66                                    | 33.96                                    |
|    | O        | 67.65            | 61.06                                    | 61.19                                    | 68.18                                    | 68.72                                    | 57.79                                    | 61.74                                    | 61.17                                    | 61.82                                    | 61.92                                    |
|    | Zn/Zr    | ---              | 0.00                                     | 0.06                                     | 0.16                                     | 0.25                                     | 0.60                                     | 0.86                                     | 0.15                                     | 0.13                                     | 0.12                                     |
| d* | Zn       | ---              | 0.35                                     | 2.02                                     | 4.56                                     | 6.09                                     | 15.41                                    | 16.78                                    | 4.83                                     | 4.4                                      | 4.08                                     |
|    | Zr       | 40.97            | 40.03                                    | 43.96                                    | 34.51                                    | 30.98                                    | 32.09                                    | 25.3                                     | 41.23                                    | 40.37                                    | 41.88                                    |
|    | O        | 59.03            | 59.62                                    | 54.02                                    | 60.93                                    | 62.93                                    | 52.5                                     | 57.92                                    | 53.94                                    | 55.23                                    | 54.03                                    |
|    | Zn/Zr    | ---              | 0.01                                     | 0.05                                     | 0.13                                     | 0.20                                     | 0.48                                     | 0.66                                     | 0.12                                     | 0.11                                     | 0.10                                     |

\* a, b, c, and d sets are measured at 5, 10, 15, and 20 kV electron beam energy, respectively.

Energy dispersive X-ray analysis (EDX) was employed to analyze the composition of the catalyst materials. The observed loading closely corresponds to the targeted values for the Zn/Zr ratio up to 0.28, as indicated in Table S1. However, at higher loadings, the detected amount of Zn on the catalysts near the surface exceeds the nominal values. This discrepancy is likely attributed to the separation of ZnO from the mixed oxide lattice, a finding supported by X-ray diffraction (XRD) and nitrogen physisorption results. Furthermore, the zinc concentration exhibits a decreasing trend as the voltage of the measurements increases. This suggests that zinc is less incorporated in the bulk of the metal oxide, indicating a surface enrichment of Zn.

## Section 2. Raman spectroscopy

The phase assignment in the XRD profiles was confirmed by Raman spectroscopy (Fig. 2). Broad bands at 273, 467, and 652  $\text{cm}^{-1}$  indicate the fluorite-like cubic structure<sup>1</sup> for  $\text{Zn}_{0.19}\text{ZrO}_y$ -500 and  $\text{Zn}_{0.19}\text{ZrO}_y$ -700, with the 467  $\text{cm}^{-1}$  band corresponding to the  $\text{Zr}^{4+}$ -O stretch.<sup>2</sup> The band at 320  $\text{cm}^{-1}$  is associated with a pseudo-cubic phase, where cations maintain a cubic structure while oxygen atoms undergo tetragonal distortion.<sup>1</sup> Upon calcination at 800 °C, the Raman spectrum changes considerably. New peaks corresponding to characteristic bands of the monoclinic and tetragonal phases dominate, centered respectively at 185, 192, 340, 386, 480, 566, 582, 615, 645  $\text{cm}^{-1}$  and 227, 456, 506  $\text{cm}^{-1}$ .<sup>1-3</sup>

## Section 3. $\text{N}_2$ physisorption

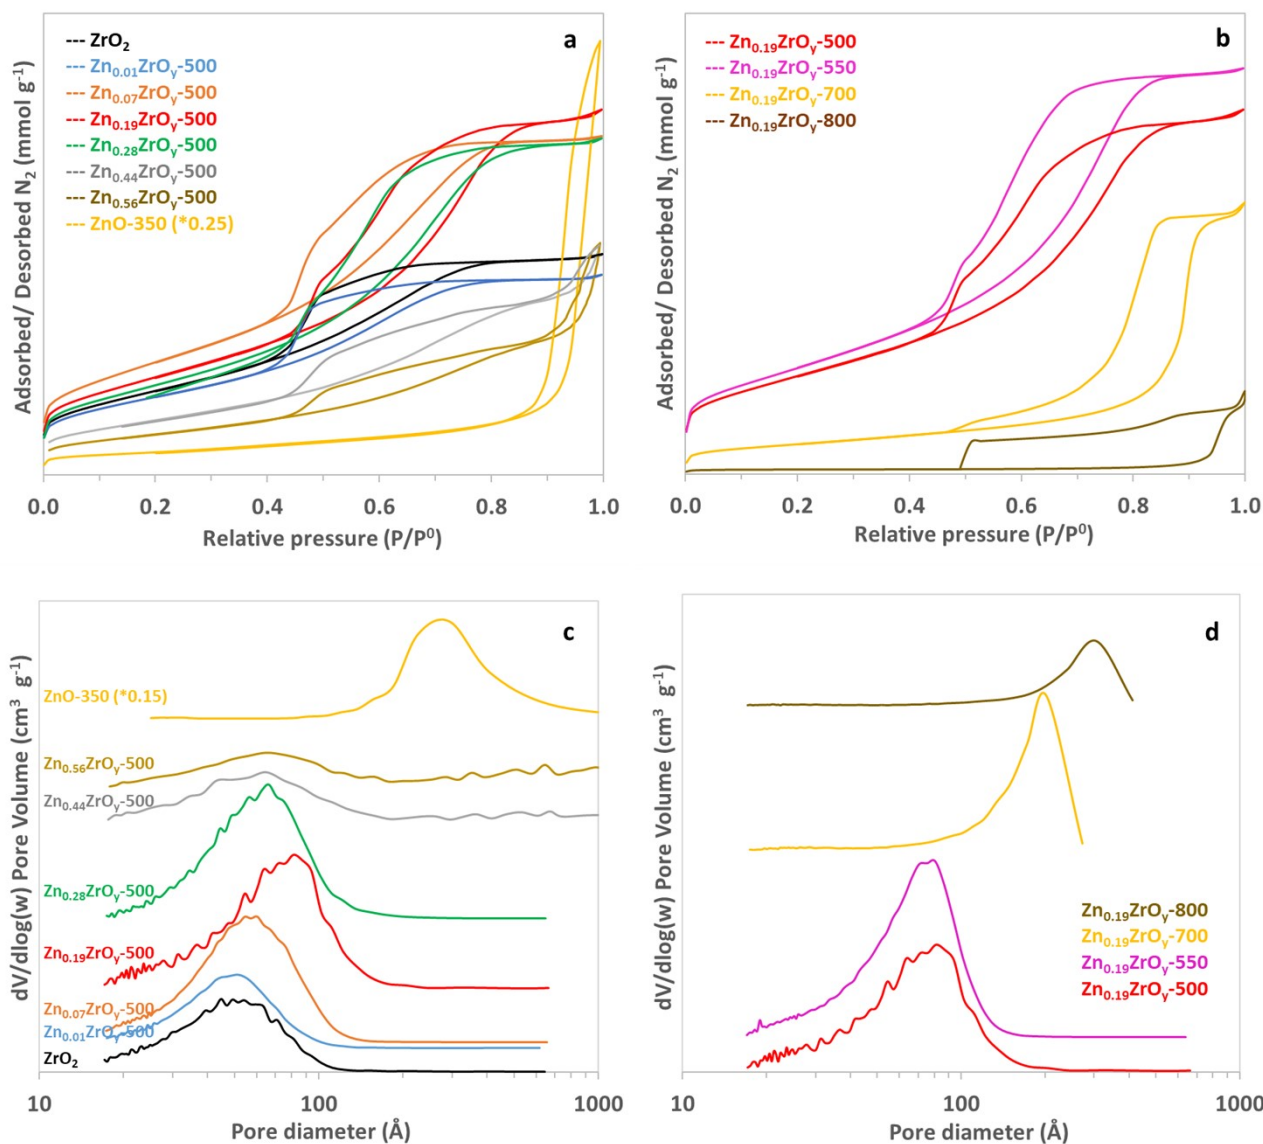

**Fig. S1** N<sub>2</sub> adsorption-desorption isotherm of (a) Zn<sub>x</sub>ZrO<sub>y</sub>-500 catalysts and (b) Zn<sub>0.19</sub>ZrO<sub>y</sub>-T calcined at 500, 550, 700, and 800 °C. Pore size distribution of (c) Zn<sub>x</sub>ZrO<sub>y</sub>-500 catalysts and (d) Zn<sub>0.19</sub>ZrO<sub>y</sub>-T calcined at 500, 550, 700, and 800 °C.

## Section 4. XPS

The Zr 3d spectra of ZrO<sub>2</sub> and Zn<sub>0.19</sub>ZrO<sub>y</sub>-800 were deconvoluted, considering the presence of both monoclinic and tetragonal phases, with a constant FWHM of 1.84 eV. Deconvolution of Zn<sub>0.07</sub>ZrO<sub>y</sub>-500, Zn<sub>0.19</sub>ZrO<sub>y</sub>-500, and Zn<sub>0.19</sub>ZrO<sub>y</sub>-700 XPS spectra with a constant FWHM of 1.84 eV revealed a peak at higher binding energies compared to the tetragonal phase, attributed to the formation of the cubic phase, and the emergence of a peak at 181.3 eV, assigned to Zn-O-Zr species. The broadening of the peaks in these samples was fitted with additional peaks at lower binding energies.

The Zn 2p spectra were deconvoluted considering the emergence of the Zn<sup>2+</sup> peak at 1021.3 eV and keeping the FWHM constant at 2.0. The peak broadening at higher binding energies was fitted with a peak assigned to Zn<sup>(2+δ)+</sup> species, while the peak broadening at lower binding energies was fitted with additional peaks attributed to Zn<sup>(2-δ)+</sup> species.

**Table S2.** Details of the peak deconvolution of the Zn 2p, Zr 3d, and O 1s XPS spectra.

| Catalyst                        | Zn 2p <sub>3/2</sub> |                  |         |                      | Zr 3d <sub>5/2</sub> |         |                      |                      |                      | O 1s                  |                      |                                  |
|---------------------------------|----------------------|------------------|---------|----------------------|----------------------|---------|----------------------|----------------------|----------------------|-----------------------|----------------------|----------------------------------|
|                                 | Zn <sup>(2-δ)+</sup> | Zn <sup>2+</sup> | Zn-O-Zr | Zn <sup>(2+δ)+</sup> | Zr <sup>(4-δ)+</sup> | Zr-O-Zn | Zr <sup>4+</sup> - m | Zr <sup>4+</sup> - t | Zr <sup>4+</sup> - c | O <sub>sublayer</sub> | O <sub>lattice</sub> | O <sub>chemisorbed surface</sub> |
| ZrO <sub>2</sub> (t-m)          | ---                  | ---              | ---     | ---                  | 27.3%                | ---     | 49.0%                | 23.6%                | ---                  | 23.2%                 | 52.5%                | 24.4%                            |
| Zn <sub>0.07</sub> Zr-500 (c)   | 24.0%                | 46.8%            | 29.2%   | ---                  | 16.1%                | 29.2%   | ---                  | ---                  | 54.7%                | 15.6%                 | 58.7%                | 25.7%                            |
| Zn <sub>0.19</sub> Zr-500 (c)   | 38.6%                | 26.3%            | 35.1%   | ---                  | 34.7%                | 35.5%   | ---                  | ---                  | 29.8%                | 45.2%                 | 40.2%                | 14.6%                            |
| Zn <sub>0.19</sub> Zr-700 (c)   | 16.9%                | 27.1%            | 39.6%   | 16.4%                | 10.1%                | 40.9%   | ---                  | ---                  | 49.0%                | 16.8%                 | 52.8%                | 30.3%                            |
| Zn <sub>0.19</sub> Zr-800 (t-m) | 43.6%                | 56.4%            | ---     | ---                  | ---                  | ---     | ---                  | 34.5%                | 65.5%                | 24.6%                 | 50.4%                | 25.0%                            |

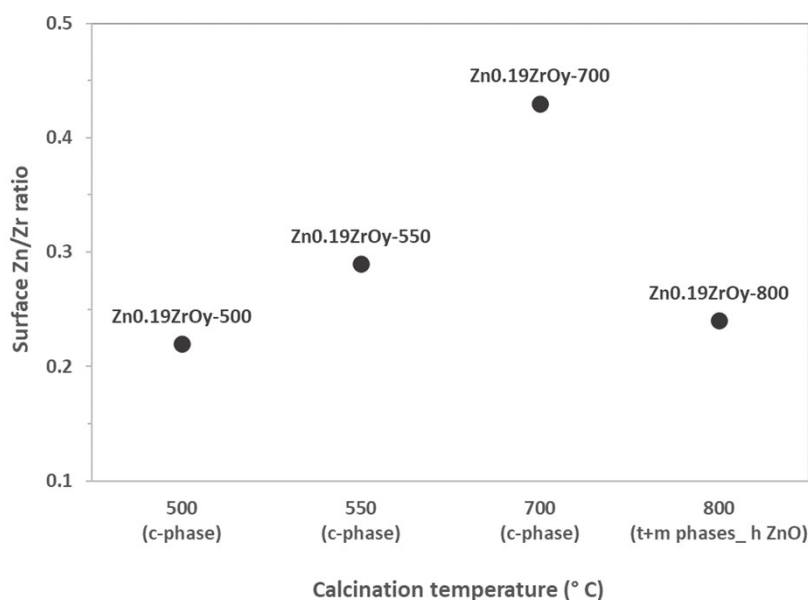

**Fig. S2** Effect of calcination temperature on surface Zn/Zr ratio (from XPS).

The O 1s spectra are presented in Fig. S3, revealing spectral contributions at approximately 529-530 eV with two shoulders at lower and higher binding energies. The peaks observed at binding energies of 529-530 eV are identified as lattice oxygen ions (O<sup>2-</sup>). In contrast, the peak at higher binding energy is attributed to weakly charged surface chemisorbed oxygen species, such as surface hydroxyl groups or oxygen vacancies.<sup>4</sup> The peak at lower binding energy (527.6 eV) can be assigned to physically adsorbed oxygen species<sup>5</sup> or oxygen atoms that are in subsurface layers (due to differences in their

chemical environment). The relative percentage of each oxygen component is summarized in Table S2. After Zn addition, the peaks shift to higher binding energies, representing the binding energy of O atoms in different crystal phases of  $ZrO_2$ . The emergence of low-energy O 1s species at 526.4 eV likely arises from the charge transfer between the neighboring  $O^{2-}$ ,  $Zn^{2+}$ , and  $Zr^{4+}$  species<sup>6</sup> due to the formation of a mixed metal oxide.<sup>5,7</sup> Increasing the Zn/Zr ratio to 0.19 raises the ratio of low energy O 1s peaks while increasing the calcination temperature enhances the binding energy of the O 1s species.

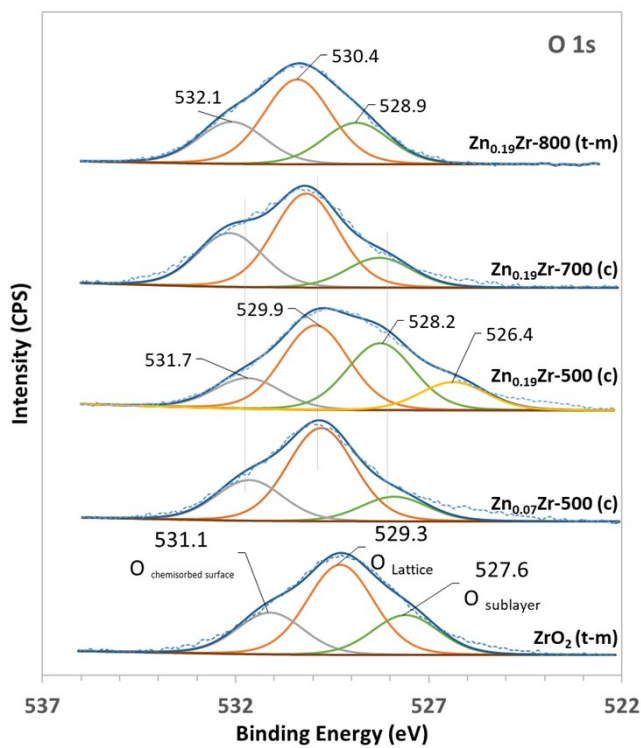

**Fig. S3** Deconvoluted XPS spectra of O 1s in  $ZrO_2$  (t + m),  $Zn_{0.07}ZrO_y-500$  (c),  $Zn_{0.19}ZrO_y-500$  (c),  $Zn_{0.19}ZrO_y-700$  (c), and  $Zn_{0.19}ZrO_y-800$  (t + m).

## Section 5. CO<sub>2</sub>-TPD

**Table S3.** Peak deconvolution of CO<sub>2</sub>-TPD profiles.

|                                          |                                         | Peak 1 | Peak 2 | Peak 3 | Total basicity |
|------------------------------------------|-----------------------------------------|--------|--------|--------|----------------|
| ZnO                                      | T °C                                    | 122    | 347    | 412    |                |
|                                          | CO <sub>2</sub> (μmol g <sup>-1</sup> ) | 0.54   | 0.22   | 0.83   | 1.59           |
|                                          | CO <sub>2</sub> (μmol m <sup>-2</sup> ) | 0.02   | 0.01   | 0.03   | 0.05           |
| ZrO <sub>2</sub> -500                    | T °C                                    | 104    | 159    | 280    |                |
|                                          | CO <sub>2</sub> (μmol g <sup>-1</sup> ) | 3.29   | 3.84   | 6.83   | 13.96          |
|                                          | CO <sub>2</sub> (μmol m <sup>-2</sup> ) | 0.12   | 0.14   | 0.26   | 0.52           |
| Zn <sub>0.01</sub> ZrO <sub>y</sub> -500 | T °C                                    | 101    | 153    | 264    |                |
|                                          | CO <sub>2</sub> (μmol g <sup>-1</sup> ) | 3.44   | 3.81   | 8.91   | 16.17          |
|                                          | CO <sub>2</sub> (μmol m <sup>-2</sup> ) | 0.13   | 0.14   | 0.34   | 0.61           |
| Zn <sub>0.07</sub> ZrO <sub>y</sub> -500 | T °C                                    | 109    | 160    | 250    |                |
|                                          | CO <sub>2</sub> (μmol g <sup>-1</sup> ) | 5.68   | 4.92   | 12.71  | 23.31          |
|                                          | CO <sub>2</sub> (μmol m <sup>-2</sup> ) | 0.16   | 0.14   | 0.35   | 0.65           |
| Zn <sub>0.19</sub> ZrO <sub>y</sub> -500 | T °C                                    | 107    | 154    | 231    |                |
|                                          | CO <sub>2</sub> (μmol g <sup>-1</sup> ) | 6.55   | 5.03   | 14.75  | 26.33          |
|                                          | CO <sub>2</sub> (μmol m <sup>-2</sup> ) | 0.21   | 0.16   | 0.47   | 0.84           |
| Zn <sub>0.28</sub> ZrO <sub>y</sub> -500 | T °C                                    | 113    | 162    | 248    |                |
|                                          | CO <sub>2</sub> (μmol g <sup>-1</sup> ) | 9.46   | 8.43   | 26.60  | 44.48          |
|                                          | CO <sub>2</sub> (μmol m <sup>-2</sup> ) | 0.33   | 0.29   | 0.92   | 1.54           |
| Zn <sub>0.44</sub> ZrO <sub>y</sub> -500 | T °C                                    | 96     | 140    | 208    |                |
|                                          | CO <sub>2</sub> (μmol g <sup>-1</sup> ) | 1.24   | 0.72   | 3.37   | 5.32           |
|                                          | CO <sub>2</sub> (μmol m <sup>-2</sup> ) | 0.07   | 0.04   | 0.19   | 0.30           |
| Zn <sub>0.56</sub> ZrO <sub>y</sub> -500 | T °C                                    | 112    | 162    | 260    |                |
|                                          | CO <sub>2</sub> (μmol g <sup>-1</sup> ) | 0.94   | 0.91   | 1.91   | 3.76           |
|                                          | CO <sub>2</sub> (μmol m <sup>-2</sup> ) | 0.07   | 0.07   | 0.15   | 0.29           |
| Zn <sub>0.19</sub> ZrO <sub>y</sub> -550 | T °C                                    | 104    | 148    | 235    |                |
|                                          | CO <sub>2</sub> (μmol g <sup>-1</sup> ) | 6.41   | 4.25   | 16.20  | 26.86          |
|                                          | CO <sub>2</sub> (μmol m <sup>-2</sup> ) | 0.19   | 0.13   | 0.48   | 0.79           |
| Zn <sub>0.19</sub> ZrO <sub>y</sub> -700 | T °C                                    | 104    | 151    | 263    |                |
|                                          | CO <sub>2</sub> (μmol g <sup>-1</sup> ) | 8.64   | 7.57   | 21.68  | 37.88          |
|                                          | CO <sub>2</sub> (μmol m <sup>-2</sup> ) | 0.94   | 0.82   | 2.36   | 4.12           |
| Zn <sub>0.19</sub> ZrO <sub>y</sub> -800 | T °C                                    | 120    | 187    | 271    |                |
|                                          | CO <sub>2</sub> (μmol g <sup>-1</sup> ) | 0.99   | 0.82   | 0.82   | 2.64           |
|                                          | CO <sub>2</sub> (μmol m <sup>-2</sup> ) | 0.90   | 0.75   | 0.75   | 2.40           |

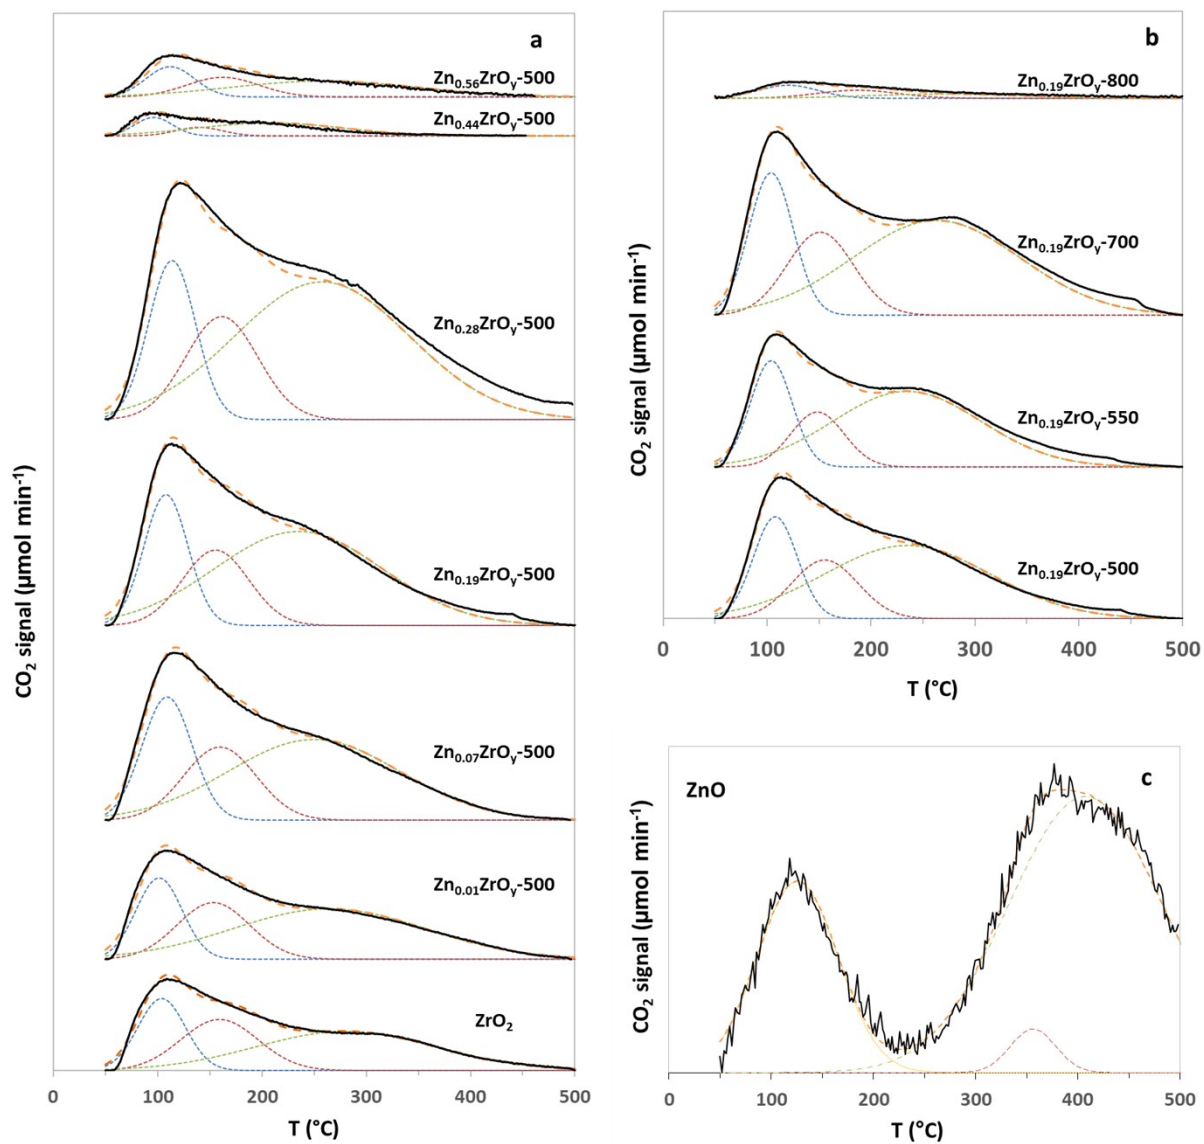

**Fig. S4** Deconvolution of CO<sub>2</sub>-TPD profiles of (a) Zn<sub>x</sub>ZrO<sub>y</sub>-500 catalysts and (b) Zn<sub>0.19</sub>ZrO<sub>y</sub>-T calcined at 500, 550, 700, and 800 °C, and (c) ZnO. (Black full lines: measured data, dotted lines: deconvoluted data, and orange dash line: envelope)

## Section 6. DRIFTS

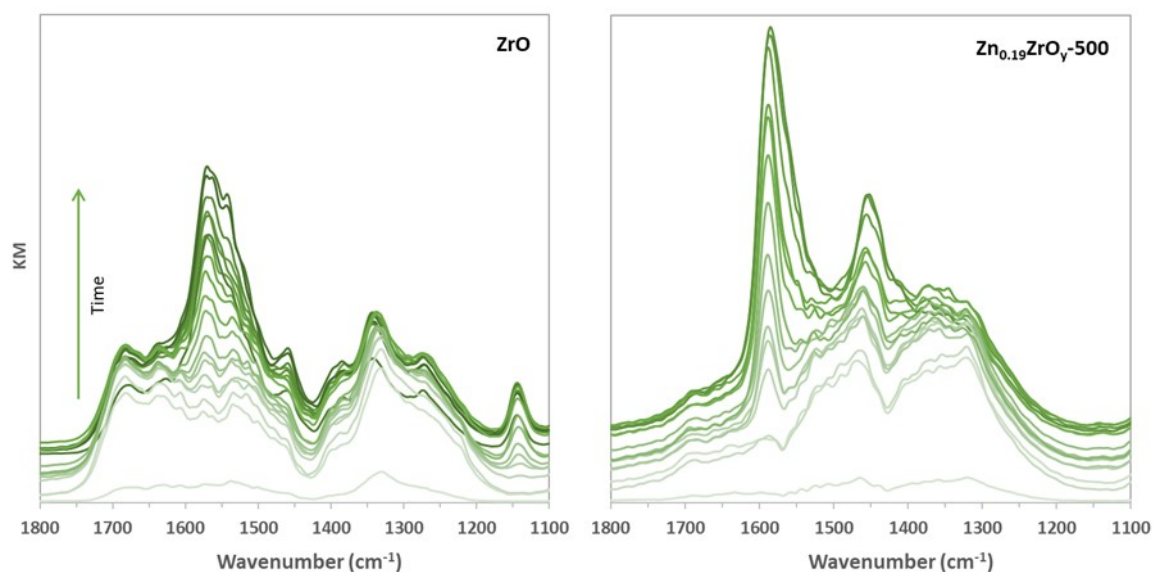

Fig. S5 Evolution of surface species during CO<sub>2</sub> adsorption on ZrO<sub>2</sub> and Zn<sub>0.19</sub>ZrO<sub>y</sub> at 325 °C and 10 bar over 40 minutes.

## Section 7. Zn<sub>x</sub>ZrO<sub>y</sub> in literature

Table S4. Comparison of Zn<sub>x</sub>ZrO<sub>y</sub> catalysts' performance in literature.

| Catalyst                            | T, °C | P, bar | GHSV, ml g <sup>-1</sup> h <sup>-1</sup> | H <sub>2</sub> :CO <sub>2</sub> | CO <sub>2</sub> conversion, % | Methanol selectivity, % | Methanol STY, g g <sub>cat</sub> <sup>-1</sup> h <sup>-1</sup> | reference  |
|-------------------------------------|-------|--------|------------------------------------------|---------------------------------|-------------------------------|-------------------------|----------------------------------------------------------------|------------|
| Zn <sub>0.19</sub> ZrO <sub>y</sub> | 325   | 45     | 21000                                    | 3                               | 4                             | 82                      | 0.20                                                           | This study |
| 20%ZnO-ZrO <sub>2</sub>             | 320   | 20     | 24000                                    | 4                               | 4                             | 82                      | 0.20                                                           | 1          |
| Zn <sub>0.2</sub> ZrO <sub>x</sub>  | 320   | 50     | 24000                                    | 4                               | 4                             | 86                      | 0.24                                                           | 2          |
| 13%ZnZrO <sub>x</sub>               | 320   | 20     | 24000                                    | 3                               | 4                             | 85                      | 0.23                                                           | 3          |
| 13%ZnO-ZrO <sub>2</sub>             | 320   | 50     | 24000                                    | 3                               | 10                            | 86                      | 0.50                                                           | 4          |
| ZnZr25                              | 325   | 10     | 3600                                     | 3                               | 8                             | 40                      | 0.04                                                           | 5          |
| 15%ZnZr                             | 300   | 40     | 12000                                    | 3                               | 3                             | 85                      | 0.11                                                           | 6          |
| 13%ZnZrO <sub>x</sub>               | 320   | 50     | 24000                                    | 4                               | 7                             | 83                      | 0.25                                                           | 7          |
| ZnO/ZrO <sub>2</sub> -F *           | 320   | 30     | 24000                                    | 4                               | 6                             | 74                      | 0.30                                                           | 8          |
| ZnZrO <sub>x</sub>                  | 330   | 45     | 10800                                    | 3                               | 6                             | 78                      | 0.18                                                           | 9          |
| 25%ZnZrO <sub>x</sub>               | 350   | 30     | 4000                                     | 3                               | 12                            | 86                      | 0.15                                                           | 10         |

\*hollow nano-frame

## Section 8. Catalyst stability

The stability of the Zn<sub>0.19</sub>ZrO<sub>y</sub>-500 catalyst was assessed in CO<sub>2</sub> hydrogenation (Fig. S6). The effect of reaction temperature was studied by increasing the temperature from 350 °C to 400 °C, maintaining each temperature for 4 hours, and then decreasing the temperature back to 350 °C to determine if the same activity could be obtained. The result shows that the catalyst remains stable under these reaction conditions.

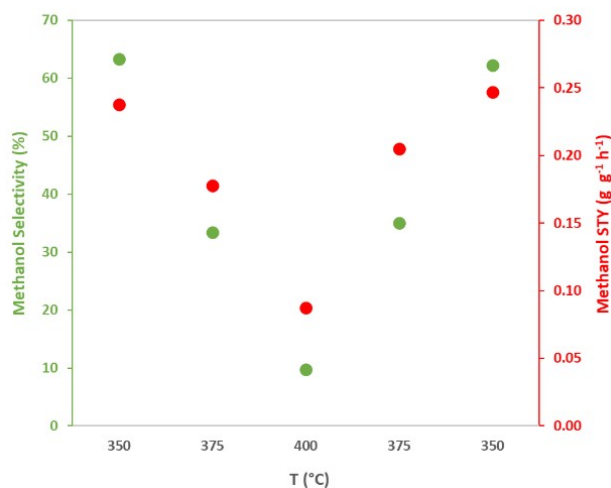

Fig. S6 Stability test of  $\text{Zn}_{0.19}\text{ZrO}_y\text{-500}$  in  $\text{CO}_2$  hydrogenation to methanol at 45 bar,  $\text{H}_2:\text{CO}_2:\text{Ar}=3:1:1$ , and  $\text{GHSV}= 21000 \text{ Nml g}_{\text{cat}}^{-1} \text{ h}^{-1}$ .

## Section 9. Parameters correlation

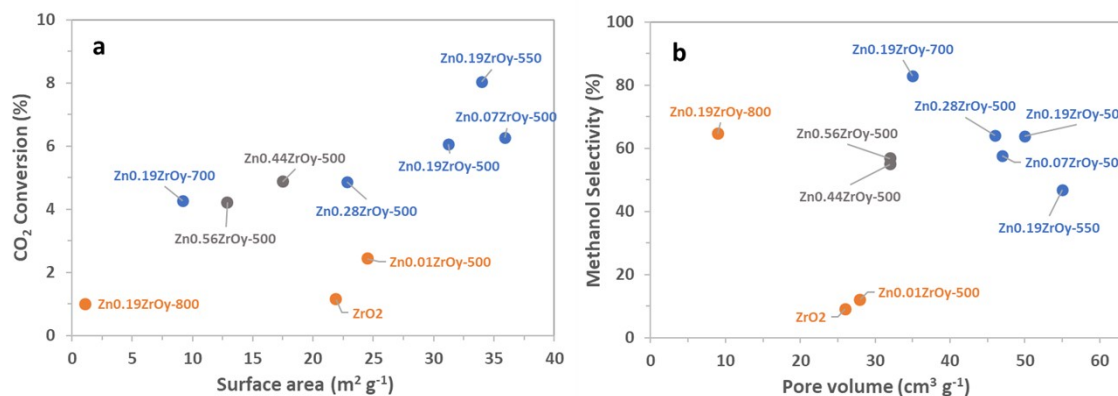

Fig. S7 Effect of (a) surface area on  $\text{CO}_2$  conversion and (b) pore volume on methanol selectivity at 350 °C, 45 bar,  $\text{H}_2:\text{CO}_2:\text{Ar}=3:1:1$ , and  $\text{GHSV}= 21000 \text{ Nml g}_{\text{cat}}^{-1} \text{ h}^{-1}$  (blue colour: pure cubic-phase, grey colour: cubic-phase + h-ZnO, and orange colour: the rest of the samples).

Fig. S8 reveals the negative effect of ZnO formation on catalyst performance within the cubic-phase samples.

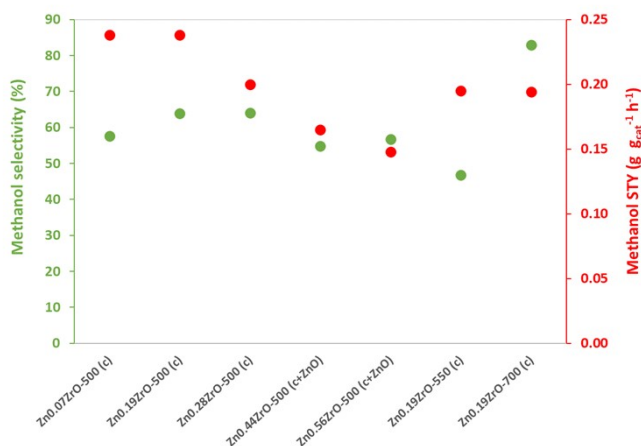

Fig. S8 Comparison of the performance of the cubic-phase catalysts at 350 °C, 45 bar,  $\text{H}_2:\text{CO}_2:\text{Ar}=3:1:1$ , and  $\text{GHSV}= 21000 \text{ Nml g}_{\text{cat}}^{-1} \text{ h}^{-1}$ .



The amount of CO<sub>2</sub> adsorption correlates with the surface Zn/Zr ratio (Fig. S9a). However, the increasing surface ratio of Zn/Zr and the consequently increased CO<sub>2</sub> adsorption do not directly relate to the methanol formation rate. Methanol formation peaks at a narrow Zn/Zr ratio of 0.18-0.22 and an adsorbed CO<sub>2</sub> range of 23.3-26.3 μmol g<sup>-1</sup> (Fig. S9a and b).

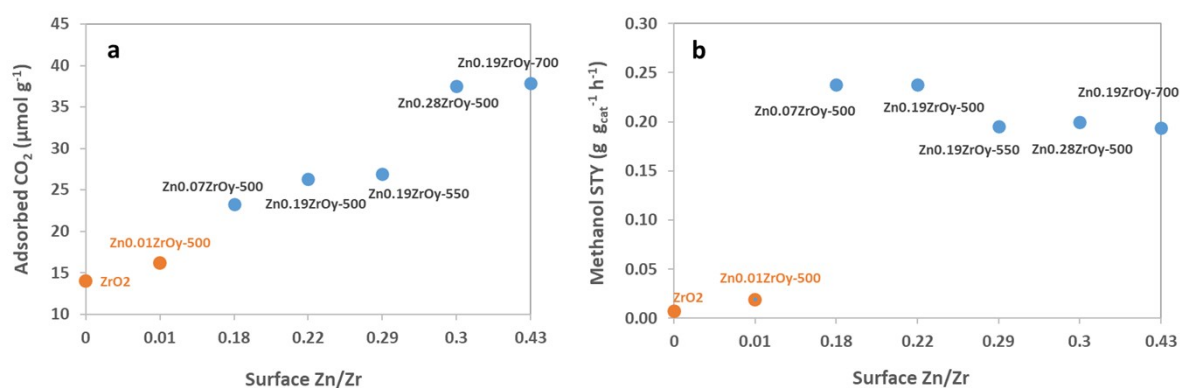

**Fig. S9** Effect of surface Zn/Zr ratio on (a) CO<sub>2</sub> adsorption capacity, and (b) methanol formation at 350 °C, 45 bar, H<sub>2</sub>:CO<sub>2</sub>:Ar=3:1:1, and GHSV= 21000 Nml g<sub>cat</sub><sup>-1</sup> h<sup>-1</sup>.

## References

- Han, Z. *et al.* CO<sub>2</sub> hydrogenation to methanol on ZnO-ZrO<sub>2</sub> solid solution catalysts with ordered mesoporous structure. *Journal of Catalysis* **396**, 242–250 (2021).
- Lee, K. *et al.* Atomic Pd-promoted ZnZrO<sub>x</sub> solid solution catalyst for CO<sub>2</sub> hydrogenation to methanol. *Applied Catalysis B: Environmental* **304**, (2022).
- Feng, Z. *et al.* Asymmetric Sites on the ZnZrO<sub>x</sub> Catalyst for Promoting Formate Formation and Transformation in CO<sub>2</sub> Hydrogenation. *J. Am. Chem. Soc.* **145**, 12663–12672 (2023).
- Wang, J. *et al.* A highly selective and stable ZnO-ZrO<sub>2</sub> solid solution catalyst for CO<sub>2</sub> hydrogenation to methanol. *Sci. Adv.* **3**, 1701290 (2017).
- Tada, S. *et al.* Active Sites on ZnZrO<sub>x</sub> Solid Solution Catalysts for CO<sub>2</sub>-to-Methanol Hydrogenation. *ACS Catalysis* **12**, 7748–7759 (2022).
- Ticali, P. *et al.* CO<sub>2</sub> hydrogenation to methanol and hydrocarbons over bifunctional Zn-doped ZrO<sub>2</sub>/zeolite catalysts. *Catalysis Science & Technology* **11**, 1249–1268 (2021).
- Pinheiro Araújo, T. *et al.* Design of Flame-Made ZnZrO<sub>x</sub> Catalysts for Sustainable Methanol Synthesis from CO<sub>2</sub>. *Adv. Energy Mater.* **13**, (2023).
- Ren, Q. *et al.* Role of the structure and morphology of zirconia in ZnO/ZrO<sub>2</sub> catalyst for CO<sub>2</sub> hydrogenation to methanol. *Molecular Catalysis* **547**, 113280–113280 (2023).
- Xu, D., Hong, X. & Liu, G. Highly dispersed metal doping to ZnZr oxide catalyst for CO<sub>2</sub> hydrogenation to methanol: Insight into hydrogen spillover. *Journal of Catalysis* **393**, 207–214 (2021).
- Zhang, W. *et al.* Effective conversion of CO<sub>2</sub> into light olefins over a bifunctional catalyst consisting of La-modified ZnZrO<sub>x</sub> oxide and acidic zeolite. *Catal.Sci.Technol.* **12**, (2022).
